# Supplementary material for: Drivers and hazards of consumption of unpasteurised bovine milk and milk products in high-income countries
Source: PeerJ. 2022 May 16;10:e13426. doi: 10.7717/peerj.13426 (PMC9135038; doi:10.7717/peerj.13426)
Supplement: Supplemental Information 4 [file peerj-10-13426-s004.xlsx]

## Sheet: Sheet1
Year	Month	Country	WHO group	Etiology full	Serotype	Etiology	Food item	Outbreaks	Cases	Deaths	Place of consumption	Source
2001	7	USA	AMR A	Brucella unknown sp.		Brucella	Cheese	1	4	0	Unknown	NORS CDC	https://wwwn.cdc.gov/norsdashboard/
2008	3	USA	AMR A	Campylobacter coli		Campylobacter spp.	Milk	1	5	0	Unknown	NORS CDC	https://wwwn.cdc.gov/norsdashboard/
2011	7	USA	AMR A	Campylobacter coli		Campylobacter spp.	Milk	1	3	0	Unknown	NORS CDC	https://wwwn.cdc.gov/norsdashboard/
2011	6	USA	AMR A	Campylobacter coli		Campylobacter spp.	Milk	1	3	0	Unknown	NORS CDC	https://wwwn.cdc.gov/norsdashboard/
2013	1	USA	AMR A	Campylobacter coli		Campylobacter spp.	Milk	1	29	0	Unknown	NORS CDC	https://wwwn.cdc.gov/norsdashboard/
2017		Denmark	EUR A	Campylobacter jejuni		Campylobacter spp.	Milk	1	66	0	Farm	EFSA	https://zenodo.org/record/1475841#.YP50tu2xVp10
2017		Denmark	EUR A	Campylobacter jejuni		Campylobacter spp.	Milk	1	6	0	Farm	EFSA	https://zenodo.org/record/1475841#.YP50tu2xVp10
2017		Germany	EUR A	Campylobacter jejuni		Campylobacter spp.	Milk	1	33	0	Household	EFSA	https://zenodo.org/record/1475841#.YP50tu2xVp10
2017		Germany	EUR A	Campylobacter jejuni		Campylobacter spp.	Milk	1	3	0	Household	EFSA	https://zenodo.org/record/1475841#.YP50tu2xVp10
2017		germany	EUR A	Campylobacter jejuni		Campylobacter spp.	Milk	1	3	0	Farm	EFSA	https://zenodo.org/record/1475841#.YP50tu2xVp10
2017		Germany	EUR A	Campylobacter jejuni		Campylobacter spp.	Milk	1	6	0	Farm	EFSA	https://zenodo.org/record/1475841#.YP50tu2xVp10
2017		Germany	EUR A	Campylobacter jejuni		Campylobacter spp.	Milk	1	5	0	Household	EFSA	https://zenodo.org/record/1475841#.YP50tu2xVp10
2017		Germany	EUR A	Campylobacter jejuni		Campylobacter spp.	Milk	1	7	0	Household	EFSA	https://zenodo.org/record/1475841#.YP50tu2xVp10
2017		Germany	EUR A	Campylobacter jejuni		Campylobacter spp.	Milk	1	24	0	Farm	EFSA	https://zenodo.org/record/1475841#.YP50tu2xVp10
2017		Germany	EUR A	Campylobacter jejuni		Campylobacter spp.	Milk	1	8	0	Farm	EFSA	https://zenodo.org/record/1475841#.YP50tu2xVp10
2017		Germany	EUR A	Campylobacter jejuni		Campylobacter spp.	Milk	1	14	0	Farm	EFSA	https://zenodo.org/record/1475841#.YP50tu2xVp10
2017		Germany	EUR A	Campylobacter jejuni		Campylobacter spp.	Milk	1	16	0	Household	EFSA	https://zenodo.org/record/1475841#.YP50tu2xVp10
2017		Germany	EUR A	Campylobacter jejuni		Campylobacter spp.	Milk	1	6	0	Farm	EFSA	https://zenodo.org/record/1475841#.YP50tu2xVp10
2017		Germany	EUR A	Campylobacter jejuni		Campylobacter spp.	Milk	1	47	0	Household	EFSA	https://zenodo.org/record/1475841#.YP50tu2xVp10
2017		Germany	EUR A	Campylobacter jejuni		Campylobacter spp.	Milk	1	19	0	Farm	EFSA	https://zenodo.org/record/1475841#.YP50tu2xVp10
2017		Germany	EUR A	Campylobacter jejuni		Campylobacter spp.	Milk	1	15	0	Household	EFSA	https://zenodo.org/record/1475841#.YP50tu2xVp10
2017		Germany	EUR A	Campylobacter jejuni		Campylobacter spp.	Milk	1	8	0	Household	EFSA	https://zenodo.org/record/1475841#.YP50tu2xVp10
2017		Germany	EUR A	Campylobacter jejuni		Campylobacter spp.	Milk	1	7	0	Farm	EFSA	https://zenodo.org/record/1475841#.YP50tu2xVp10
2015		Germany	EUR A	Campylobacter jejuni		Campylobacter spp.	Milk	1	4	0	Farm	EFSA	https://efsa.onlinelibrary.wiley.com/doi/full/10.2903/j.efsa.2016.4634
2015		Germany	EUR A	Campylobacter jejuni		Campylobacter spp.	Milk	1	15	0	Household	EFSA	https://efsa.onlinelibrary.wiley.com/doi/full/10.2903/j.efsa.2016.4634
2015		Germany	EUR A	Campylobacter jejuni		Campylobacter spp.	Milk	1	2	0	Unknown	EFSA	https://efsa.onlinelibrary.wiley.com/doi/full/10.2903/j.efsa.2016.4634
2015		Germany	EUR A	Campylobacter jejuni		Campylobacter spp.	Milk	1	3	0	Unknown	EFSA	https://efsa.onlinelibrary.wiley.com/doi/full/10.2903/j.efsa.2016.4634
2015		Germany	EUR A	Campylobacter jejuni		Campylobacter spp.	Milk	1	2	0	Household	EFSA	https://efsa.onlinelibrary.wiley.com/doi/full/10.2903/j.efsa.2016.4634
2015		Germany	EUR A	Campylobacter jejuni		Campylobacter spp.	Milk	1	4	0	Household	EFSA	https://efsa.onlinelibrary.wiley.com/doi/full/10.2903/j.efsa.2016.4634
2015		Germany	EUR A	Campylobacter jejuni		Campylobacter spp.	Milk	1	26	0	Farm	EFSA	https://efsa.onlinelibrary.wiley.com/doi/full/10.2903/j.efsa.2016.4634
2015		Germany	EUR A	Campylobacter jejuni		Campylobacter spp.	Milk	1	23	0	Household	EFSA	https://efsa.onlinelibrary.wiley.com/doi/full/10.2903/j.efsa.2016.4634
2015		Germany	EUR A	Campylobacter jejuni		Campylobacter spp.	Milk	1	4	0	Household	EFSA	https://efsa.onlinelibrary.wiley.com/doi/full/10.2903/j.efsa.2016.4634
2015		Germany	EUR A	Campylobacter jejuni		Campylobacter spp.	Milk	1	18	0	Farm	EFSA	https://efsa.onlinelibrary.wiley.com/doi/full/10.2903/j.efsa.2016.4634
2015		Germany	EUR A	Campylobacter jejuni		Campylobacter spp.	Milk	1	26	0	Farm	EFSA	https://efsa.onlinelibrary.wiley.com/doi/full/10.2903/j.efsa.2016.4634
2015		Netherlands	EUR A	Campylobacter jejuni		Campylobacter spp.	Milk	1	19	0	Farm	EFSA	https://efsa.onlinelibrary.wiley.com/doi/full/10.2903/j.efsa.2016.4634
2015		Finland	EUR A	Campylobacter jejuni		Campylobacter spp.	Milk	1	15	0	Farm	EFSA	https://efsa.onlinelibrary.wiley.com/doi/full/10.2903/j.efsa.2016.4634
2008	4	USA	AMR A	Campylobacter jejuni		Campylobacter spp.	Milk	1	3	0	Unknown	NORS CDC	https://wwwn.cdc.gov/norsdashboard/
2008	4	USA	AMR A	Campylobacter jejuni		Campylobacter spp.	Milk	1	4	0	Unknown	NORS CDC	https://wwwn.cdc.gov/norsdashboard/
2008	4	USA	AMR A	Campylobacter jejuni		Campylobacter spp.	Milk	1	8	0	Unknown	NORS CDC	https://wwwn.cdc.gov/norsdashboard/
2008	8	USA	AMR A	Campylobacter jejuni		Campylobacter spp.	Milk	1	2	0	Unknown	NORS CDC	https://wwwn.cdc.gov/norsdashboard/
2008	8	USA	AMR A	Campylobacter jejuni		Campylobacter spp.	Milk	1	65	0	Unknown	NORS CDC	https://wwwn.cdc.gov/norsdashboard/
2008	4	USA	AMR A	Campylobacter jejuni		Campylobacter spp.	Milk	1	4	0	Unknown	NORS CDC	https://wwwn.cdc.gov/norsdashboard/
2008	5	USA	AMR A	Campylobacter jejuni		Campylobacter spp.	Milk	1	16	0	Unknown	NORS CDC	https://wwwn.cdc.gov/norsdashboard/
2008	11	USA	AMR A	Campylobacter jejuni		Campylobacter spp.	Milk	1	3	0	Unknown	NORS CDC	https://wwwn.cdc.gov/norsdashboard/
2009	1	USA	AMR A	Campylobacter jejuni		Campylobacter spp.	Milk	1	9	0	Unknown	NORS CDC	https://wwwn.cdc.gov/norsdashboard/
2009	5	USA	AMR A	Campylobacter jejuni		Campylobacter spp.	Milk	1	2	0	Household	NORS CDC	https://wwwn.cdc.gov/norsdashboard/
2009	8	USA	AMR A	Campylobacter jejuni		Campylobacter spp.	Milk	1	52	0	Unknown	NORS CDC	https://wwwn.cdc.gov/norsdashboard/
2009	3	USA	AMR A	Campylobacter jejuni		Campylobacter spp.	Milk	1	81	0	Unknown	NORS CDC	https://wwwn.cdc.gov/norsdashboard/
2010	1	USA	AMR A	Campylobacter jejuni		Campylobacter spp.	Milk	1	20	0	Unknown	NORS CDC	https://wwwn.cdc.gov/norsdashboard/
2010	3	USA	AMR A	Campylobacter jejuni		Campylobacter spp.	Milk	1	2	0	Unknown	NORS CDC	https://wwwn.cdc.gov/norsdashboard/
2010	2	USA	AMR A	Campylobacter jejuni		Campylobacter spp.	Milk	1	22	0	Unknown	NORS CDC	https://wwwn.cdc.gov/norsdashboard/
2010	5	USA	AMR A	Campylobacter jejuni		Campylobacter spp.	Milk	1	2	0	Unknown	NORS CDC	https://wwwn.cdc.gov/norsdashboard/
2010	5	USA	AMR A	Campylobacter jejuni		Campylobacter spp.	Milk	1	11	0	Unknown	NORS CDC	https://wwwn.cdc.gov/norsdashboard/
2010	8	USA	AMR A	Campylobacter jejuni		Campylobacter spp.	Milk	1	6	0	Unknown	NORS CDC	https://wwwn.cdc.gov/norsdashboard/
2010	10	USA	AMR A	Campylobacter jejuni		Campylobacter spp.	Milk	1	4	0	Household	NORS CDC	https://wwwn.cdc.gov/norsdashboard/
2010	9	USA	AMR A	Campylobacter jejuni		Campylobacter spp.	Milk	1	7	0	Unknown	NORS CDC	https://wwwn.cdc.gov/norsdashboard/
2010	12	USA	AMR A	Campylobacter jejuni		Campylobacter spp.	Milk	1	11	0	Unknown	NORS CDC	https://wwwn.cdc.gov/norsdashboard/
2010	7	USA	AMR A	Campylobacter jejuni		Campylobacter spp.	Milk	1	7	0	Unknown	NORS CDC	https://wwwn.cdc.gov/norsdashboard/
2010	7	USA	AMR A	Campylobacter jejuni		Campylobacter spp.	Milk	1	7	0	Household	NORS CDC	https://wwwn.cdc.gov/norsdashboard/
2010	3	USA	AMR A	Campylobacter jejuni		Campylobacter spp.	Milk	1	25	0	Unknown	NORS CDC	https://wwwn.cdc.gov/norsdashboard/
2011	3	USA	AMR A	Campylobacter jejuni		Campylobacter spp.	Milk	1	23	0	Unknown	NORS CDC	https://wwwn.cdc.gov/norsdashboard/
2011	4	USA	AMR A	Campylobacter jejuni		Campylobacter spp.	Milk	1	3	0	Unknown	NORS CDC	https://wwwn.cdc.gov/norsdashboard/
2011	6	USA	AMR A	Campylobacter jejuni		Campylobacter spp.	Milk	1	16	0	Unknown	NORS CDC	https://wwwn.cdc.gov/norsdashboard/
2011	6	USA	AMR A	Campylobacter jejuni		Campylobacter spp.	Milk	1	4	0	Unknown	NORS CDC	https://wwwn.cdc.gov/norsdashboard/
2011	5	USA	AMR A	Campylobacter jejuni		Campylobacter spp.	Milk	1	18	0	Unknown	NORS CDC	https://wwwn.cdc.gov/norsdashboard/
2011	6	USA	AMR A	Campylobacter jejuni		Campylobacter spp.	Milk	1	2	0	Unknown	NORS CDC	https://wwwn.cdc.gov/norsdashboard/
2011	6	USA	AMR A	Campylobacter jejuni		Campylobacter spp.	Milk	1	10	0	Unknown	NORS CDC	https://wwwn.cdc.gov/norsdashboard/
2011	7	USA	AMR A	Campylobacter jejuni		Campylobacter spp.	Milk	1	3	0	Unknown	NORS CDC	https://wwwn.cdc.gov/norsdashboard/
2011	9	USA	AMR A	Campylobacter jejuni		Campylobacter spp.	Milk	1	13	0	Unknown	NORS CDC	https://wwwn.cdc.gov/norsdashboard/
2012	1	USA	AMR A	Campylobacter jejuni		Campylobacter spp.	Milk	1	6	0	Unknown	NORS CDC	https://wwwn.cdc.gov/norsdashboard/
2012	5	USA	AMR A	Campylobacter jejuni		Campylobacter spp.	Milk	1	7	0	Unknown	NORS CDC	https://wwwn.cdc.gov/norsdashboard/
2012	7	USA	AMR A	Campylobacter jejuni		Campylobacter spp.	Milk	1	3	0	Unknown	NORS CDC	https://wwwn.cdc.gov/norsdashboard/
2012	8	USA	AMR A	Campylobacter jejuni		Campylobacter spp.	Milk	1	2	0	Household	NORS CDC	https://wwwn.cdc.gov/norsdashboard/
2012	3	USA	AMR A	Campylobacter jejuni		Campylobacter spp.	Cheese	1	2	0	Unknown	NORS CDC	https://wwwn.cdc.gov/norsdashboard/
2012	2	USA	AMR A	Campylobacter jejuni		Campylobacter spp.	Milk	1	8	0	Farm	NORS CDC	https://wwwn.cdc.gov/norsdashboard/
2012	11	USA	AMR A	Campylobacter jejuni		Campylobacter spp.	Milk	1	10	0	Household	NORS CDC	https://wwwn.cdc.gov/norsdashboard/
2012	6	USA	AMR A	Campylobacter jejuni		Campylobacter spp.	Milk	1	12	0	Farm	NORS CDC	https://wwwn.cdc.gov/norsdashboard/
2012	1	USA	AMR A	Campylobacter jejuni		Campylobacter spp.	Milk	1	33	0	Unknown	NORS CDC	https://wwwn.cdc.gov/norsdashboard/
2012	1	USA	AMR A	Campylobacter jejuni		Campylobacter spp.	Milk	1	148	0	Unknown	NORS CDC	https://wwwn.cdc.gov/norsdashboard/
2013	1	USA	AMR A	Campylobacter jejuni		Campylobacter spp.	Milk	1	2	0	Household	NORS CDC	https://wwwn.cdc.gov/norsdashboard/
2013	1	USA	AMR A	Campylobacter jejuni		Campylobacter spp.	Milk	1	7	0	Unknown	NORS CDC	https://wwwn.cdc.gov/norsdashboard/
2013	2	USA	AMR A	Campylobacter jejuni		Campylobacter spp.	Milk	1	2	0	Household	NORS CDC	https://wwwn.cdc.gov/norsdashboard/
2013	6	USA	AMR A	Campylobacter jejuni		Campylobacter spp.	Milk	1	6	0	Unknown	NORS CDC	https://wwwn.cdc.gov/norsdashboard/
2013	4	USA	AMR A	Campylobacter jejuni		Campylobacter spp.	Milk	1	8	0	Unknown	NORS CDC	https://wwwn.cdc.gov/norsdashboard/
2013	8	USA	AMR A	Campylobacter jejuni		Campylobacter spp.	Milk	1	26	0	Unknown	NORS CDC	https://wwwn.cdc.gov/norsdashboard/
2013	4	USA	AMR A	Campylobacter jejuni		Campylobacter spp.	Milk	1	32	0	Unknown	NORS CDC	https://wwwn.cdc.gov/norsdashboard/
2014	3	USA	AMR A	Campylobacter jejuni		Campylobacter spp.	Milk	1	19	0	Unknown	NORS CDC	https://wwwn.cdc.gov/norsdashboard/
2014	5	USA	AMR A	Campylobacter jejuni		Campylobacter spp.	Milk	1	9	0	Household	NORS CDC	https://wwwn.cdc.gov/norsdashboard/
2014	7	USA	AMR A	Campylobacter jejuni		Campylobacter spp.	Milk	1	8	0	Unknown	NORS CDC	https://wwwn.cdc.gov/norsdashboard/
2014	5	USA	AMR A	Campylobacter jejuni		Campylobacter spp.	Milk	1	99	1	Unknown	NORS CDC	https://wwwn.cdc.gov/norsdashboard/
2014	9	USA	AMR A	Campylobacter jejuni		Campylobacter spp.	Milk	1	38	0	Household	NORS CDC	https://wwwn.cdc.gov/norsdashboard/
2015	12	USA	AMR A	Campylobacter jejuni		Campylobacter spp.	Milk	1	2	0	Farm	NORS CDC	https://wwwn.cdc.gov/norsdashboard/
2015	2	USA	AMR A	Campylobacter jejuni		Campylobacter spp.	Milk	1	8	0	Unknown	NORS CDC	https://wwwn.cdc.gov/norsdashboard/
2015	9	USA	AMR A	Campylobacter jejuni		Campylobacter spp.	Milk	1	15	0	Farm	NORS CDC	https://wwwn.cdc.gov/norsdashboard/
2016	4	USA	AMR A	Campylobacter jejuni		Campylobacter spp.	Cheese	1	3	0	Household	NORS CDC	https://wwwn.cdc.gov/norsdashboard/
2016	5	USA	AMR A	Campylobacter jejuni		Campylobacter spp.	Milk	1	2	0	Unknown	NORS CDC	https://wwwn.cdc.gov/norsdashboard/
2016	10	USA	AMR A	Campylobacter jejuni		Campylobacter spp.	Milk	1	11	0	Farm	NORS CDC	https://wwwn.cdc.gov/norsdashboard/
2016	8	USA	AMR A	Campylobacter jejuni		Campylobacter spp.	Milk	1	17	0	Farm	NORS CDC	https://wwwn.cdc.gov/norsdashboard/
2016	6	USA	AMR A	Campylobacter jejuni		Campylobacter spp.	Milk	1	2	0	Farm	NORS CDC	https://wwwn.cdc.gov/norsdashboard/
2017	3	USA	AMR A	Campylobacter jejuni		Campylobacter spp.	Milk	1	9	0	Farm	NORS CDC	https://wwwn.cdc.gov/norsdashboard/
2017	2	USA	AMR A	Campylobacter jejuni		Campylobacter spp.	Milk	1	6	0	Farm	NORS CDC	https://wwwn.cdc.gov/norsdashboard/
2017	9	USA	AMR A	Campylobacter jejuni		Campylobacter spp.	Milk	1	2	0	Farm	NORS CDC	https://wwwn.cdc.gov/norsdashboard/
2017	5	USA	AMR A	Campylobacter jejuni		Campylobacter spp.	Milk	1	11	0	Farm	NORS CDC	https://wwwn.cdc.gov/norsdashboard/
2017	11	USA	AMR A	Campylobacter jejuni		Campylobacter spp.	Milk	1	3	0	Farm	NORS CDC	https://wwwn.cdc.gov/norsdashboard/
2018	6	USA	AMR A	Campylobacter jejuni		Campylobacter spp.	Milk	1	16	0	Farm	NORS CDC	https://wwwn.cdc.gov/norsdashboard/
2016		UK	EUR A	Campylobacter jejuni		Campylobacter spp.	Milk	1	69	0	Farm	PHE/FSA	https://acmsf.food.gov.uk/sites/default/files/acm_1256_raw_drinking_milk.pdf
2000	5	USA	AMR A	Campylobacter jejuni		Campylobacter spp.	Milk	1	19	0	Unknown	NORS CDC	https://wwwn.cdc.gov/norsdashboard/
2000	8	USA	AMR A	Campylobacter jejuni		Campylobacter spp.	Milk	1	3	0	Unknown	NORS CDC	https://wwwn.cdc.gov/norsdashboard/
2000	6	USA	AMR A	Campylobacter jejuni		Campylobacter spp.	Milk	1	11	0	Unknown	NORS CDC	https://wwwn.cdc.gov/norsdashboard/
2000	2	USA	AMR A	Campylobacter jejuni		Campylobacter spp.	Milk	1	21	0	Unknown	NORS CDC	https://wwwn.cdc.gov/norsdashboard/
2000	9	USA	AMR A	Campylobacter jejuni		Campylobacter spp.	Milk	1	39	0	Fair	NORS CDC	https://wwwn.cdc.gov/norsdashboard/
2000	4	USA	AMR A	Campylobacter jejuni		Campylobacter spp.	Cheese	1	18	0	Household	NORS CDC	https://wwwn.cdc.gov/norsdashboard/
2000	6	USA	AMR A	Campylobacter jejuni		Campylobacter spp.	Milk	1	42	0	Unknown	NORS CDC	https://wwwn.cdc.gov/norsdashboard/
2000	2	USA	AMR A	Campylobacter jejuni		Campylobacter spp.	Milk	1	4	0	Unknown	NORS CDC	https://wwwn.cdc.gov/norsdashboard/
2002	1	USA	AMR A	Campylobacter jejuni		Campylobacter spp.	Milk	1	2	0	Household	NORS CDC	https://wwwn.cdc.gov/norsdashboard/
2001	11	USA	AMR A	Campylobacter jejuni		Campylobacter spp.	Milk	1	75	0	Unknown	NORS CDC	https://wwwn.cdc.gov/norsdashboard/
2002	4	USA	AMR A	Campylobacter jejuni		Campylobacter spp.	Milk	1	46	0	Unknown	NORS CDC	https://wwwn.cdc.gov/norsdashboard/
2001	3	USA	AMR A	Campylobacter jejuni		Campylobacter spp.	Milk	1	4	0	Household	NORS CDC	https://wwwn.cdc.gov/norsdashboard/
2002	1	USA	AMR A	Campylobacter jejuni		Campylobacter spp.	Milk	1	13	0	Household	NORS CDC	https://wwwn.cdc.gov/norsdashboard/
2003	3	USA	AMR A	Campylobacter jejuni		Campylobacter spp.	Milk	1	2	0	Unknown	NORS CDC	https://wwwn.cdc.gov/norsdashboard/
2003	4	USA	AMR A	Campylobacter jejuni		Campylobacter spp.	Cheese	1	18	0	Unknown	NORS CDC	https://wwwn.cdc.gov/norsdashboard/
2003	10	USA	AMR A	Campylobacter jejuni		Campylobacter spp.	Milk	1	6	0	Unknown	NORS CDC	https://wwwn.cdc.gov/norsdashboard/
2004	2	USA	AMR A	Campylobacter jejuni		Campylobacter spp.	Milk	1	32	0	Unknown	NORS CDC	https://wwwn.cdc.gov/norsdashboard/
2003	1	USA	AMR A	Campylobacter jejuni		Campylobacter spp.	Cheese	1	9	0	Unknown	NORS CDC	https://wwwn.cdc.gov/norsdashboard/
2005	3	USA	AMR A	Campylobacter jejuni		Campylobacter spp.	Milk	1	3	0	Unknown	NORS CDC	https://wwwn.cdc.gov/norsdashboard/
2005	5	USA	AMR A	Campylobacter jejuni		Campylobacter spp.	Milk	1	4	0	Unknown	NORS CDC	https://wwwn.cdc.gov/norsdashboard/
2005	5	USA	AMR A	Campylobacter jejuni		Campylobacter spp.	Milk	1	33	0	Religious facility	NORS CDC	https://wwwn.cdc.gov/norsdashboard/
2005	7	USA	AMR A	Campylobacter jejuni		Campylobacter spp.	Milk	1	11	0	Household	NORS CDC	https://wwwn.cdc.gov/norsdashboard/
2005	9	USA	AMR A	Campylobacter jejuni		Campylobacter spp.	Milk	1	13	0	Unknown	NORS CDC	https://wwwn.cdc.gov/norsdashboard/
2005	11	USA	AMR A	Campylobacter jejuni		Campylobacter spp.	Milk	1	5	0	Unknown	NORS CDC	https://wwwn.cdc.gov/norsdashboard/
2005	9	USA	AMR A	Campylobacter jejuni		Campylobacter spp.	Milk	1	11	0	Unknown	NORS CDC	https://wwwn.cdc.gov/norsdashboard/
2006	1	USA	AMR A	Campylobacter jejuni		Campylobacter spp.	Milk	1	18	0	Unknown	NORS CDC	https://wwwn.cdc.gov/norsdashboard/
2005	12	USA	AMR A	Campylobacter jejuni		Campylobacter spp.	Milk	1	22	0	Unknown	NORS CDC	https://wwwn.cdc.gov/norsdashboard/
2006	5	USA	AMR A	Campylobacter jejuni		Campylobacter spp.	Cheese	1	58	0	Household	NORS CDC	https://wwwn.cdc.gov/norsdashboard/
2006	5	USA	AMR A	Campylobacter jejuni		Campylobacter spp.	Milk	1	9	0	Unknown	NORS CDC	https://wwwn.cdc.gov/norsdashboard/
2007	4	USA	AMR A	Campylobacter jejuni		Campylobacter spp.	Milk	1	11	0	Unknown	NORS CDC	https://wwwn.cdc.gov/norsdashboard/
2007	7	USA	AMR A	Campylobacter jejuni		Campylobacter spp.	Milk	1	8	0	Unknown	NORS CDC	https://wwwn.cdc.gov/norsdashboard/
2007	10	USA	AMR A	Campylobacter jejuni		Campylobacter spp.	Cheese	1	68	0	Fair	NORS CDC	https://wwwn.cdc.gov/norsdashboard/
2007	10	USA	AMR A	Campylobacter jejuni		Campylobacter spp.	Cheese	1	16	0	Unknown	NORS CDC	https://wwwn.cdc.gov/norsdashboard/
2007	12	USA	AMR A	Campylobacter jejuni		Campylobacter spp.	Milk	1	18	0	Unknown	NORS CDC	https://wwwn.cdc.gov/norsdashboard/
2007	9	USA	AMR A	Campylobacter jejuni		Campylobacter spp.	Milk	1	4	0	Unknown	NORS CDC	https://wwwn.cdc.gov/norsdashboard/
2014		Japan	WPR A	Campylobacter jejuni		Campylobacter spp.	Milk	1	40	0	Unknown	Ministry of Health Japan	https://www.e-stat.go.jp/stat-search/files?page=1&toukei=00450191&tstat=000001040259
2018		Japan	WPR A	Campylobacter jejuni		Campylobacter spp.	Milk	3	38	0	Ryokan	Ministry of Health Japan	https://www.e-stat.go.jp/stat-search/files?page=1&toukei=00450191&tstat=000001040259
2017		UK	EUR A	Campylobacter unknown sp.		Campylobacter spp.	Milk	1	4	0	Farm	EFSA	https://zenodo.org/record/1475841#.YP50tu2xVp10
2007		Netherlands	EUR A	Campylobacter unknown sp.		Campylobacter spp.	Milk	1	18	0	Unknown	EFSA	https://efsa.onlinelibrary.wiley.com/doi/epdf/10.2903/j.efsa.2015.3940
2007		Denmark	EUR A	Campylobacter unknown sp.		Campylobacter spp.	Milk	2	12	0	Unknown	EFSA	https://efsa.onlinelibrary.wiley.com/doi/epdf/10.2903/j.efsa.2015.3940
2007		Finland	EUR A	Campylobacter unknown sp.		Campylobacter spp.	Milk	1	4	0	Unknown	EFSA	https://efsa.onlinelibrary.wiley.com/doi/epdf/10.2903/j.efsa.2015.3940
2007		Germany	EUR A	Campylobacter unknown sp.		Campylobacter spp.	Milk	1	14	0	Unknown	EFSA	https://efsa.onlinelibrary.wiley.com/doi/epdf/10.2903/j.efsa.2015.3940
2008		Austria	EUR A	Campylobacter unknown sp.		Campylobacter spp.	Milk	1	2	0	Unknown	EFSA	https://efsa.onlinelibrary.wiley.com/doi/epdf/10.2903/j.efsa.2015.3940
2008		Germany	EUR A	Campylobacter unknown sp.		Campylobacter spp.	Milk	1	45	0	Unknown	EFSA	https://efsa.onlinelibrary.wiley.com/doi/epdf/10.2903/j.efsa.2015.3940
2008		Netherlands	EUR A	Campylobacter unknown sp.		Campylobacter spp.	Milk	1	8	0	Unknown	EFSA	https://efsa.onlinelibrary.wiley.com/doi/epdf/10.2903/j.efsa.2015.3940
2010		Germany	EUR A	Campylobacter unknown sp.		Campylobacter spp.	Milk	3	42	0	Unknown	EFSA	https://efsa.onlinelibrary.wiley.com/doi/epdf/10.2903/j.efsa.2015.3940
2011		Germany	EUR A	Campylobacter unknown sp.		Campylobacter spp.	Milk	3	32	0	Unknown	EFSA	https://efsa.onlinelibrary.wiley.com/doi/epdf/10.2903/j.efsa.2015.3940
2011		Sweden	EUR A	Campylobacter unknown sp.		Campylobacter spp.	Milk	1	13	0	Unknown	EFSA	https://efsa.onlinelibrary.wiley.com/doi/epdf/10.2903/j.efsa.2015.3940
2012		Denmark	EUR A	Campylobacter unknown sp.		Campylobacter spp.	Milk	1	11	0	Unknown	EFSA	https://efsa.onlinelibrary.wiley.com/doi/epdf/10.2903/j.efsa.2015.3940
2012		Germany	EUR A	Campylobacter unknown sp.		Campylobacter spp.	Milk	1	3	0	Unknown	EFSA	https://efsa.onlinelibrary.wiley.com/doi/epdf/10.2903/j.efsa.2015.3940
2012		Finland	EUR A	Campylobacter unknown sp.		Campylobacter spp.	Milk	2	22	0	Unknown	EFSA	https://efsa.onlinelibrary.wiley.com/doi/epdf/10.2903/j.efsa.2015.3940
2015		Germany	EUR A	Campylobacter unknown sp.		Campylobacter spp.	Milk	1	26	0	Unknown	EFSA	https://efsa.onlinelibrary.wiley.com/doi/epdf/10.2903/j.efsa.2015.3940
2008	8	USA	AMR A	Campylobacter unknown sp.		Campylobacter spp.	Milk	1	2	0	Unknown	NORS CDC	https://wwwn.cdc.gov/norsdashboard/
2010	1	USA	AMR A	Campylobacter unknown sp.		Campylobacter spp.	Milk	1	15	0	Household	NORS CDC	https://wwwn.cdc.gov/norsdashboard/
2011	5	USA	AMR A	Campylobacter unknown sp.		Campylobacter spp.	Milk	1	2	0	Unknown	NORS CDC	https://wwwn.cdc.gov/norsdashboard/
2011	6	USA	AMR A	Campylobacter unknown sp.		Campylobacter spp.	Milk	1	5	0	Unknown	NORS CDC	https://wwwn.cdc.gov/norsdashboard/
2012	1	USA	AMR A	Campylobacter unknown sp.		Campylobacter spp.	Milk	1	2	0	Unknown	NORS CDC	https://wwwn.cdc.gov/norsdashboard/
2012	6	USA	AMR A	Campylobacter unknown sp.		Campylobacter spp.	Milk	1	5	0	Unknown	NORS CDC	https://wwwn.cdc.gov/norsdashboard/
2012	8	USA	AMR A	Campylobacter unknown sp.		Campylobacter spp.	Milk	1	4	0	Household	NORS CDC	https://wwwn.cdc.gov/norsdashboard/
2013	10	USA	AMR A	Campylobacter unknown sp.		Campylobacter spp.	Milk	1	9	0	Unknown	NORS CDC	https://wwwn.cdc.gov/norsdashboard/
2014	1	USA	AMR A	Campylobacter unknown sp.		Campylobacter spp.	Milk	1	2	0	Unknown	NORS CDC	https://wwwn.cdc.gov/norsdashboard/
2014	3	USA	AMR A	Campylobacter unknown sp.		Campylobacter spp.	Milk	1	2	0	Household	NORS CDC	https://wwwn.cdc.gov/norsdashboard/
2014	7	USA	AMR A	Campylobacter unknown sp.		Campylobacter spp.	Milk	1	3	0	Household	NORS CDC	https://wwwn.cdc.gov/norsdashboard/
2014	10	USA	AMR A	Campylobacter unknown sp.		Campylobacter spp.	Milk	1	2	0	Unknown	NORS CDC	https://wwwn.cdc.gov/norsdashboard/
2015	4	USA	AMR A	Campylobacter unknown sp.		Campylobacter spp.	Milk	1	3	0	Unknown	NORS CDC	https://wwwn.cdc.gov/norsdashboard/
2015	6	USA	AMR A	Campylobacter unknown sp.		Campylobacter spp.	Milk	1	6	0	Unknown	NORS CDC	https://wwwn.cdc.gov/norsdashboard/
2015	5	USA	AMR A	Campylobacter unknown sp.		Campylobacter spp.	Milk	1	2	0	Farm	NORS CDC	https://wwwn.cdc.gov/norsdashboard/
2015	3	USA	AMR A	Campylobacter unknown sp.		Campylobacter spp.	Cheese	1	4	0	Farm	NORS CDC	https://wwwn.cdc.gov/norsdashboard/
2015	11	USA	AMR A	Campylobacter unknown sp.		Campylobacter spp.	Cheese	1	8	0	Unknown	NORS CDC	https://wwwn.cdc.gov/norsdashboard/
2016	3	USA	AMR A	Campylobacter unknown sp.		Campylobacter spp.	Milk	1	7	0	Farm	NORS CDC	https://wwwn.cdc.gov/norsdashboard/
2016	3	USA	AMR A	Campylobacter unknown sp.		Campylobacter spp.	Cheese	1	15	0	Household	NORS CDC	https://wwwn.cdc.gov/norsdashboard/
2017	11	USA	AMR A	Campylobacter unknown sp.		Campylobacter spp.	Milk	1	13	0	Farm	NORS CDC	https://wwwn.cdc.gov/norsdashboard/
2017	3	USA	AMR A	Campylobacter unknown sp.		Campylobacter spp.	Milk	1	2	0	Farm	NORS CDC	https://wwwn.cdc.gov/norsdashboard/
2018	2	USA	AMR A	Campylobacter unknown sp.		Campylobacter spp.	Milk	1	3	0	Farm	NORS CDC	https://wwwn.cdc.gov/norsdashboard/
2017		UK	EUR A	Campylobacter unknown sp.		Campylobacter spp.	Milk	1	5	0	Farm	PHE/FSA	https://acmsf.food.gov.uk/sites/default/files/acm_1256_raw_drinking_milk.pdf
2017		UK	EUR A	Campylobacter unknown sp.		Campylobacter spp.	Milk	1	18	0	Farm	PHE/FSA	https://acmsf.food.gov.uk/sites/default/files/acm_1256_raw_drinking_milk.pdf
2000	2	USA	AMR A	Campylobacter unknown sp.		Campylobacter spp.	Milk	1	2	0	Unknown	NORS CDC	https://wwwn.cdc.gov/norsdashboard/
2000	6	USA	AMR A	Campylobacter unknown sp.		Campylobacter spp.	Milk	1	8	0	Unknown	NORS CDC	https://wwwn.cdc.gov/norsdashboard/
2002	9	USA	AMR A	Campylobacter unknown sp.		Campylobacter spp.	Milk	1	12	0	Unknown	NORS CDC	https://wwwn.cdc.gov/norsdashboard/
2004	7	USA	AMR A	Campylobacter unknown sp.		Campylobacter spp.	Milk	1	6	0	Unknown	NORS CDC	https://wwwn.cdc.gov/norsdashboard/
2006	1	USA	AMR A	Campylobacter unknown sp.		Campylobacter spp.	Milk	1	3	0	Unknown	NORS CDC	https://wwwn.cdc.gov/norsdashboard/
2006	2	USA	AMR A	Campylobacter unknown sp.		Campylobacter spp.	Milk	1	2	0	Unknown	NORS CDC	https://wwwn.cdc.gov/norsdashboard/
2006	9	USA	AMR A	Campylobacter unknown sp.		Campylobacter spp.	Milk	1	5	0	Unknown	NORS CDC	https://wwwn.cdc.gov/norsdashboard/
2007	4	USA	AMR A	Campylobacter unknown sp.		Campylobacter spp.	Milk	1	2	0	Unknown	NORS CDC	https://wwwn.cdc.gov/norsdashboard/
2007	11	USA	AMR A	Campylobacter unknown sp.		Campylobacter spp.	Milk	1	11	0	Unknown	NORS CDC	https://wwwn.cdc.gov/norsdashboard/
2000	3	New Zealand	WPR A	Campylobacter unknown sp.		Campylobacter spp.	Milk	1	4	0	Farm	ESR	Available by request from ksc.surveillancequeries@esr.cri.nz
2001	9	New Zealand	WPR A	Campylobacter unknown sp.		Campylobacter spp.	Milk	1	3	0	Unknown	ESR	Available by request from ksc.surveillancequeries@esr.cri.nz
2002	11	New Zealand	WPR A	Campylobacter unknown sp.		Campylobacter spp.	Milk	1	2	0	Farm	ESR	Available by request from ksc.surveillancequeries@esr.cri.nz
2004	2	New Zealand	WPR A	Campylobacter unknown sp.		Campylobacter spp.	Milk	1	2	0	Unknown	ESR	Available by request from ksc.surveillancequeries@esr.cri.nz
2008	7	New Zealand	WPR A	Campylobacter unknown sp.		Campylobacter spp.	Milk	1	2	0	Farm	ESR	Available by request from ksc.surveillancequeries@esr.cri.nz
2009	5	New Zealand	WPR A	Campylobacter unknown sp.		Campylobacter spp.	Milk	1	2	0	Unknown	ESR	Available by request from ksc.surveillancequeries@esr.cri.nz
2009	8	New Zealand	WPR A	Campylobacter unknown sp.		Campylobacter spp.	Milk	1	16	0	Unknown	ESR	Available by request from ksc.surveillancequeries@esr.cri.nz
2010	10	New Zealand	WPR A	Campylobacter unknown sp.		Campylobacter spp.	Milk	1	4	0	Unknown	ESR	Available by request from ksc.surveillancequeries@esr.cri.nz
2010	11	New Zealand	WPR A	Campylobacter unknown sp.		Campylobacter spp.	Milk	1	2	0	Unknown	ESR	Available by request from ksc.surveillancequeries@esr.cri.nz
2010	12	New Zealand	WPR A	Campylobacter unknown sp.		Campylobacter spp.	Milk	1	3	0	Unknown	ESR	Available by request from ksc.surveillancequeries@esr.cri.nz
2011	4	New Zealand	WPR A	Campylobacter unknown sp.		Campylobacter spp.	Milk	1	4	0	Unknown	ESR	Available by request from ksc.surveillancequeries@esr.cri.nz
2011	9	New Zealand	WPR A	Campylobacter unknown sp.		Campylobacter spp.	Milk	1	4	0	School	ESR	Available by request from ksc.surveillancequeries@esr.cri.nz
2011	12	New Zealand	WPR A	Campylobacter unknown sp.		Campylobacter spp.	Milk	1	8	0	Unknown	ESR	Available by request from ksc.surveillancequeries@esr.cri.nz
2012		New Zealand	WPR A	Campylobacter unknown sp.		Campylobacter spp.	Milk	1	4	0	Unknown	ESR	Available by request from ksc.surveillancequeries@esr.cri.nz
2012	8	New Zealand	WPR A	Campylobacter unknown sp.		Campylobacter spp.	Milk	1	2	0	Unknown	ESR	Available by request from ksc.surveillancequeries@esr.cri.nz
2012	10	New Zealand	WPR A	Campylobacter unknown sp.		Campylobacter spp.	Milk	1	5	0	Farm	ESR	Available by request from ksc.surveillancequeries@esr.cri.nz
2013	2	New Zealand	WPR A	Campylobacter unknown sp.		Campylobacter spp.	Milk	1	4	0	Unknown	ESR	Available by request from ksc.surveillancequeries@esr.cri.nz
2013	4	New Zealand	WPR A	Campylobacter unknown sp.		Campylobacter spp.	Milk	1	2	0	Unknown	ESR	Available by request from ksc.surveillancequeries@esr.cri.nz
2013	4	New Zealand	WPR A	Campylobacter unknown sp.		Campylobacter spp.	Milk	1	4	0	Unknown	ESR	Available by request from ksc.surveillancequeries@esr.cri.nz
2013	8	New Zealand	WPR A	Campylobacter unknown sp.		Campylobacter spp.	Milk	1	2	0	Farm	ESR	Available by request from ksc.surveillancequeries@esr.cri.nz
2014	3	New Zealand	WPR A	Campylobacter unknown sp.		Campylobacter spp.	Milk	1	7	0	Unknown	ESR	Available by request from ksc.surveillancequeries@esr.cri.nz
2014	5	New Zealand	WPR A	Campylobacter unknown sp.		Campylobacter spp.	Milk	1	6	0	Unknown	ESR	Available by request from ksc.surveillancequeries@esr.cri.nz
2014	8	New Zealand	WPR A	Campylobacter unknown sp.		Campylobacter spp.	Milk	1	4	0	Household	ESR	Available by request from ksc.surveillancequeries@esr.cri.nz
2014	9	New Zealand	WPR A	Campylobacter unknown sp.		Campylobacter spp.	Milk	1	2	0	Household	ESR	Available by request from ksc.surveillancequeries@esr.cri.nz
2014	9	New Zealand	WPR A	Campylobacter unknown sp.		Campylobacter spp.	Milk	1	2	0	Unknown	ESR	Available by request from ksc.surveillancequeries@esr.cri.nz
2015	8	New Zealand	WPR A	Campylobacter unknown sp.		Campylobacter spp.	Milk	1	4	0	Household	ESR	Available by request from ksc.surveillancequeries@esr.cri.nz
2015	10	New Zealand	WPR A	Campylobacter unknown sp.		Campylobacter spp.	Milk	1	3	0	Farm	ESR	Available by request from ksc.surveillancequeries@esr.cri.nz
2015	12	New Zealand	WPR A	Campylobacter unknown sp.		Campylobacter spp.	Milk	1	11	0	Farm	ESR	Available by request from ksc.surveillancequeries@esr.cri.nz
2016	5	New Zealand	WPR A	Campylobacter unknown sp.		Campylobacter spp.	Milk	1	4	0	Farm	ESR	Available by request from ksc.surveillancequeries@esr.cri.nz
2016	8	New Zealand	WPR A	Campylobacter unknown sp.		Campylobacter spp.	Milk	1	7	0	Farm	ESR	Available by request from ksc.surveillancequeries@esr.cri.nz
2016	10	New Zealand	WPR A	Campylobacter unknown sp.		Campylobacter spp.	Milk	1	2	0	Farm	ESR	Available by request from ksc.surveillancequeries@esr.cri.nz
2016	12	New Zealand	WPR A	Campylobacter unknown sp.		Campylobacter spp.	Milk	1	5	0	Farm	ESR	Available by request from ksc.surveillancequeries@esr.cri.nz
2017	6	New Zealand	WPR A	Campylobacter unknown sp.		Campylobacter spp.	Milk	1	3	0	Farm	ESR	Available by request from ksc.surveillancequeries@esr.cri.nz
2018	3	New Zealand	WPR A	Campylobacter unknown sp.		Campylobacter spp.	Milk	1	2	0	Farm	ESR	Available by request from ksc.surveillancequeries@esr.cri.nz
2018	5	New Zealand	WPR A	Campylobacter unknown sp.		Campylobacter spp.	Milk	1	2	0	Farm	ESR	Available by request from ksc.surveillancequeries@esr.cri.nz
2018	6	New Zealand	WPR A	Campylobacter unknown sp.		Campylobacter spp.	Milk	1	4	0	Farm	ESR	Available by request from ksc.surveillancequeries@esr.cri.nz
2018	10	New Zealand	WPR A	Campylobacter unknown sp.		Campylobacter spp.	Milk	1	2	0	Farm	ESR	Available by request from ksc.surveillancequeries@esr.cri.nz
2018	10	New Zealand	WPR A	Campylobacter unknown sp.		Campylobacter spp.	Milk	1	3	0	Unknown	ESR	Available by request from ksc.surveillancequeries@esr.cri.nz
2011	5	USA	AMR A	Coxiella burnetii		Coxiella burnetii	Milk	1	5	0	Household	Michigan Disease Surveillance System (MDSS)	https://academic.oup.com/cid/article/55/10/1387/322724?login=true
2014	1	USA	AMR A	Cryptosporidium parvum	unknown	Cryptosporidium spp.	Milk	1	4	0	Unknown	NORS CDC	https://wwwn.cdc.gov/norsdashboard/
2016	4	USA	AMR A	Cryptosporidium parvum	IIaA15G2R1	Cryptosporidium spp.	Milk	1	3	0	Farm	NORS CDC	https://wwwn.cdc.gov/norsdashboard/
2018	10	USA	AMR A	Cryptosporidium parvum	unknown	Cryptosporidium spp.	Milk	1	3	0	Farm	NORS CDC	https://wwwn.cdc.gov/norsdashboard/
2014	12	USA	AMR A	Cryptosporidium unknown sp.		Cryptosporidium spp.	Milk	1	4	0	Farm	NORS CDC	https://wwwn.cdc.gov/norsdashboard/
2015	6	USA	AMR A	Cryptosporidium unknown sp.		Cryptosporidium spp.	Milk	1	2	0	Unknown	NORS CDC	https://wwwn.cdc.gov/norsdashboard/
2016	8	USA	AMR A	Cryptosporidium unknown sp.		Cryptosporidium spp.	Milk	1	6	0	Farm	NORS CDC	https://wwwn.cdc.gov/norsdashboard/
2018	9	USA	AMR A	Cryptosporidium unknown sp.		Cryptosporidium spp.	Milk	1	3	0	Farm	NORS CDC	https://wwwn.cdc.gov/norsdashboard/
2004	9	New Zealand	WPR A	Cryptosporidium unknown sp.		Cryptosporidium spp.	Milk	1	8	0	Farm	ESR	Available by request from ksc.surveillancequeries@esr.cri.nz
2007	11	New Zealand	WPR A	Cryptosporidium unknown sp.		Cryptosporidium spp.	Milk	1	6	0	Farm	ESR	Available by request from ksc.surveillancequeries@esr.cri.nz
2010	9	New Zealand	WPR A	Cryptosporidium unknown sp.		Cryptosporidium spp.	Milk	1	3	0	Farm	ESR	Available by request from ksc.surveillancequeries@esr.cri.nz
2010	9	New Zealand	WPR A	Cryptosporidium unknown sp.		Cryptosporidium spp.	Milk	1	2	0	Unknown	ESR	Available by request from ksc.surveillancequeries@esr.cri.nz
2012	9	New Zealand	WPR A	Cryptosporidium unknown sp.		Cryptosporidium spp.	Milk	1	2	0	Farm	ESR	Available by request from ksc.surveillancequeries@esr.cri.nz
2013	8	New Zealand	WPR A	Cryptosporidium unknown sp.		Cryptosporidium spp.	Milk	1	5	0	Farm	ESR	Available by request from ksc.surveillancequeries@esr.cri.nz
2015	10	New Zealand	WPR A	Cryptosporidium unknown sp.		Cryptosporidium spp.	Milk	1	11	0	Farm	ESR	Available by request from ksc.surveillancequeries@esr.cri.nz
2017		Germany	EUR A	Escherichia coli	O157:H7	Escherichia coli	Milk	1	12	0	Work	EFSA	https://zenodo.org/record/1475841#.YP50tu2xVp10
2017		UK	EUR A	Escherichia coli	O157:H7	Escherichia coli	Milk	1	7	0	Farm	EFSA	https://zenodo.org/record/1475841#.YP50tu2xVp10
2008		Netherlands	EUR A	Escherichia coli	unknown	Escherichia coli	Milk	1	23	0	Unknown	EFSA	https://efsa.onlinelibrary.wiley.com/doi/full/10.2903/j.efsa.2016.4634
2012		Finland	EUR A	Escherichia coli		Escherichia coli	Milk	1	8	0	Unknown	EFSA	https://efsa.onlinelibrary.wiley.com/doi/full/10.2903/j.efsa.2016.4634
2015		Ireland	EUR A	Escherichia coli	unknown	Escherichia coli	Milk	1	3	0	Unknown	EFSA	https://efsa.onlinelibrary.wiley.com/doi/full/10.2903/j.efsa.2016.4634
2008	6	USA	AMR A	Escherichia coli	O157:NM (H-)	Escherichia coli	Milk	1	14	0	Household	NORS CDC	https://wwwn.cdc.gov/norsdashboard/
2008	8	USA	AMR A	Escherichia coli	O157:H7	Escherichia coli	Milk	1	6	0	Unknown	NORS CDC	https://wwwn.cdc.gov/norsdashboard/
2009	9	USA	AMR A	Escherichia coli	O157:H7	Escherichia coli	Milk	1	3	0	Unknown	NORS CDC	https://wwwn.cdc.gov/norsdashboard/
2010	2	USA	AMR A	Escherichia coli	O157:H7	Escherichia coli	Milk	1	3	0	Household	NORS CDC	https://wwwn.cdc.gov/norsdashboard/
2010	2	USA	AMR A	Escherichia coli	O26:H11	Escherichia coli	Milk	1	6	0	Unknown	NORS CDC	https://wwwn.cdc.gov/norsdashboard/
2010	5	USA	AMR A	Escherichia coli	O157:H7	Escherichia coli	Milk	1	2	0	Unknown	NORS CDC	https://wwwn.cdc.gov/norsdashboard/
2010	10	USA	AMR A	Escherichia coli	O157:H7	Escherichia coli	Cheese	1	38	0	Grocery store	NORS CDC	https://wwwn.cdc.gov/norsdashboard/
2010	9	USA	AMR A	Escherichia coli	O157:H7	Escherichia coli	Cheese	1	8	0	Restaurant	NORS CDC	https://wwwn.cdc.gov/norsdashboard/
2011	8	USA	AMR A	Escherichia coli	O157:H7	Escherichia coli	Milk	1	5	0	Unknown	NORS CDC	https://wwwn.cdc.gov/norsdashboard/
2012	3	USA	AMR A	Escherichia coli	O157:H7	Escherichia coli	Milk	1	19	0	Household	NORS CDC	https://wwwn.cdc.gov/norsdashboard/
2012	4	USA	AMR A	Escherichia coli	O157:H7	Escherichia coli	Milk	1	16	0	Unknown	NORS CDC	https://wwwn.cdc.gov/norsdashboard/
2012	7	USA	AMR A	Escherichia coli	O111:NM	Escherichia coli	Milk	1	2	0	Household	NORS CDC	https://wwwn.cdc.gov/norsdashboard/
2013	10	USA	AMR A	Escherichia coli	O157:H7	Escherichia coli	Milk	1	9	0	Unknown	NORS CDC	https://wwwn.cdc.gov/norsdashboard/
2013	3	USA	AMR A	Escherichia coli	O157:H7	Escherichia coli	Milk	1	3	0	Unknown	NORS CDC	https://wwwn.cdc.gov/norsdashboard/
2014	3	USA	AMR A	Escherichia coli	O157:H7	Escherichia coli	Milk	1	2	0	Household	NORS CDC	https://wwwn.cdc.gov/norsdashboard/
2014	9	USA	AMR A	Escherichia coli	O157:H7	Escherichia coli	Milk	1	4	0	Household	NORS CDC	https://wwwn.cdc.gov/norsdashboard/
2015	3	USA	AMR A	Escherichia coli	unknown	Escherichia coli	Milk	1	4	0	Unknown	NORS CDC	https://wwwn.cdc.gov/norsdashboard/
2016	3	USA	AMR A	Escherichia coli	O157:H7	Escherichia coli	Milk	1	14	0	Farm	NORS CDC	https://wwwn.cdc.gov/norsdashboard/
2016	1	USA	AMR A	Escherichia coli	O157:H7	Escherichia coli	Milk	1	10	0	Household	NORS CDC	https://wwwn.cdc.gov/norsdashboard/
2016	3	USA	AMR A	Escherichia coli	unknown	Escherichia coli	Cheese	1	7	0	Restaurant	NORS CDC	https://wwwn.cdc.gov/norsdashboard/
2016	8	USA	AMR A	Escherichia coli	O157:H7	Escherichia coli	Milk	1	4	0	Household	NORS CDC	https://wwwn.cdc.gov/norsdashboard/
2018	5	USA	AMR A	Escherichia coli	O157:H7	Escherichia coli	Milk	1	17	0	Farm	NORS CDC	https://wwwn.cdc.gov/norsdashboard/
2018	1	USA	AMR A	Escherichia coli	O157:H7	Escherichia coli	Milk	1	2	0	Farm	NORS CDC	https://wwwn.cdc.gov/norsdashboard/
2018	8	USA	AMR A	Escherichia coli	O121	Escherichia coli	Milk	1	2	0	Farm	NORS CDC	https://wwwn.cdc.gov/norsdashboard/
2014		UK	EUR A	Escherichia coli	O157:H7	Escherichia coli	Milk	1	9	0	Farm	PHE/FSA	https://acmsf.food.gov.uk/sites/default/files/acm_1256_raw_drinking_milk.pdf
2016		UK	EUR A	Escherichia coli	O157:H7	Escherichia coli	Cheese	1	4	0	Multiple	PHE	https://www.cambridge.org/core/journals/epidemiology-and-infection/article/gastrointestinal-infections-caused-by-consumption-of-raw-drinking-milk-in-england-wales-19922017/3E0D1D13A7CDD3D54E5BEBB924B593E1
2001	11	USA	AMR A	Escherichia coli	O157:H7	Escherichia coli	Milk	1	202	0	School	NORS CDC	https://wwwn.cdc.gov/norsdashboard/
2003	5	USA	AMR A	Escherichia coli	O157:H7;	Escherichia coli	Milk	1	3	0	Household	NORS CDC	https://wwwn.cdc.gov/norsdashboard/
2005	11	USA	AMR A	Escherichia coli	O157:H7	Escherichia coli	Milk	1	18	0	Household	NORS CDC	https://wwwn.cdc.gov/norsdashboard/
2006	9	USA	AMR A	Escherichia coli	O157:H7	Escherichia coli	Milk	1	2	0	Unknown	NORS CDC	https://wwwn.cdc.gov/norsdashboard/
2006	11	USA	AMR A	Escherichia coli	O157:H7	Escherichia coli	Milk	1	4	0	Unknown	NORS CDC	https://wwwn.cdc.gov/norsdashboard/
2006	9	USA	AMR A	Escherichia coli	O157:H7	Escherichia coli	Milk	1	6	0	Unknown	NORS CDC	https://wwwn.cdc.gov/norsdashboard/
2014	3	New Zealand	WPR A	Escherichia coli		Escherichia coli	Milk	1	5	0	Household	ESR	Available by request from ksc.surveillancequeries@esr.cri.nz
2014	4	New Zealand	WPR A	Escherichia coli		Escherichia coli	Milk	1	5	0	School	ESR	Available by request from ksc.surveillancequeries@esr.cri.nz
2014	9	New Zealand	WPR A	Escherichia coli		Escherichia coli	Milk	1	2	0	Unknown	ESR	Available by request from ksc.surveillancequeries@esr.cri.nz
2016	2	New Zealand	WPR A	Escherichia coli		Escherichia coli	Milk	1	11	0	Farm	ESR	Available by request from ksc.surveillancequeries@esr.cri.nz
2010	11	New Zealand	WPR A	Giardia		Giardia	Milk	1	3	0	Unknown	ESR	Available by request from ksc.surveillancequeries@esr.cri.nz
2011	3	New Zealand	WPR A	Giardia		Giardia	Milk	1	6	0	Unknown	ESR	Available by request from ksc.surveillancequeries@esr.cri.nz
2013	3	New Zealand	WPR A	Giardia		Giardia	Milk	1	6	0	Unknown	ESR	Available by request from ksc.surveillancequeries@esr.cri.nz
2014	1	New Zealand	WPR A	Giardia		Giardia	Milk	1	5	0	Unknown	ESR	Available by request from ksc.surveillancequeries@esr.cri.nz
2011	10	USA	AMR A	Listeria monocytogenes		Listeria monocytogenes	Cheese	1	15	1	Restaurant	NORS CDC	https://wwwn.cdc.gov/norsdashboard/
2014	6	USA	AMR A	Listeria monocytogenes		Listeria monocytogenes	Milk	1	2	1	Farm	NORS CDC	https://wwwn.cdc.gov/norsdashboard/
2016	9	USA	AMR A	Listeria monocytogenes		Listeria monocytogenes	Cheese	1	10	2	Unknown	NORS CDC	https://wwwn.cdc.gov/norsdashboard/
2016		UK	EUR A	Listeria monocytogenes		Listeria monocytogenes	Cheese	1	1	1	Farm	PHE	https://www.cambridge.org/core/journals/epidemiology-and-infection/article/gastrointestinal-infections-caused-by-consumption-of-raw-drinking-milk-in-england-wales-19922017/3E0D1D13A7CDD3D54E5BEBB924B593E1
2017		Austria	EUR A	Salmonella dublin		Salmonella spp.	Cheese	1	4	0	Farm	EFSA	https://zenodo.org/record/1475841#.YP50tu2xVp8
2017		UK	EUR A	Salmonella dublin		Salmonella spp.	Milk	1	1	0	Farm	PHE/FSA	https://acmsf.food.gov.uk/sites/default/files/acm_1256_raw_drinking_milk.pdf
2017		Croatia	EUR A	Salmonella enterica	Enteritidis	Salmonella spp.	Cheese	1	3	0	Household	EFSA	https://zenodo.org/record/1475841#.YP50tu2xVp10
2017		France	EUR A	Salmonella enterica	Enteritidis	Salmonella spp.	Cheese	1	29	0	School	EFSA	https://zenodo.org/record/1475841#.YP50tu2xVp10
2010		Ireland	EUR A	Salmonella enterica	Typhimurium	Salmonella spp.	Milk	1	3	0	Unknown	EFSA	https://efsa.onlinelibrary.wiley.com/doi/epdf/10.2903/j.efsa.2015.3940
2008	8	USA	AMR A	Salmonella enterica	unknown	Salmonella spp.	Cream	1	43	0	Household	NORS CDC	https://wwwn.cdc.gov/norsdashboard/
2013	3	USA	AMR A	Salmonella enterica	Typhimurium	Salmonella spp.	Cheese	1	26	0	Household	NORS CDC	https://wwwn.cdc.gov/norsdashboard/
2013	6	USA	AMR A	Salmonella enterica	Typhimurium	Salmonella spp.	Milk	1	4	0	Unknown	NORS CDC	https://wwwn.cdc.gov/norsdashboard/
2013	8	USA	AMR A	Salmonella enterica	Typhimurium	Salmonella spp.	Milk	1	9	0	Unknown	NORS CDC	https://wwwn.cdc.gov/norsdashboard/
2013	10	USA	AMR A	Salmonella enterica	Montevideo	Salmonella spp.	Milk	1	2	0	Unknown	NORS CDC	https://wwwn.cdc.gov/norsdashboard/
2014	6	USA	AMR A	Salmonella enterica	Typhimurium	Salmonella spp.	Milk	1	7	0	Unknown	NORS CDC	https://wwwn.cdc.gov/norsdashboard/
2014	11	USA	AMR A	Salmonella enterica	Typhimurium	Salmonella spp.	Cheese	1	5	0	Household	NORS CDC	https://wwwn.cdc.gov/norsdashboard/
2015	4	USA	AMR A	Salmonella enterica	Newport	Salmonella spp.	Milk	1	4	0	Unknown	NORS CDC	https://wwwn.cdc.gov/norsdashboard/
2015	10	USA	AMR A	Salmonella enterica	Newport	Salmonella spp.	Milk	1	2	0	Unknown	NORS CDC	https://wwwn.cdc.gov/norsdashboard/
2016	3	USA	AMR A	Salmonella enterica	Saintpaul	Salmonella spp.	Milk	1	15	0	Farm	NORS CDC	https://wwwn.cdc.gov/norsdashboard/
2016	12	USA	AMR A	Salmonella enterica	Saintpaul	Salmonella spp.	Milk	1	10	0	Farm	NORS CDC	https://wwwn.cdc.gov/norsdashboard/
2016	4	USA	AMR A	Salmonella enterica	Typhimurium	Salmonella spp.	Cheese	1	101	0	Farm	NORS CDC	https://wwwn.cdc.gov/norsdashboard/
2016	12	USA	AMR A	Salmonella enterica	Dublin	Salmonella spp.	Milk	1	3	0	Farm	NORS CDC	https://wwwn.cdc.gov/norsdashboard/
2017	4	USA	AMR A	Salmonella enterica	Typhimurium	Salmonella spp.	Milk	1	5	0	Farm	NORS CDC	https://wwwn.cdc.gov/norsdashboard/
2017	10	USA	AMR A	Salmonella enterica	Typhimurium	Salmonella spp.	Milk	1	3	0	Farm	NORS CDC	https://wwwn.cdc.gov/norsdashboard/
2002	11	USA	AMR A	Salmonella enterica	Typhimurium	Salmonella spp.	Milk	1	107	0	Restaurant	NORS CDC	https://wwwn.cdc.gov/norsdashboard/
2001	4	USA	AMR A	Salmonella enterica	Newport	Salmonella spp.	Cheese	1	27	0	Restaurant	NORS CDC	https://wwwn.cdc.gov/norsdashboard/
2006	3	USA	AMR A	Salmonella enterica	Newport	Salmonella spp.	Cheese	1	96	0	Unknown	NORS CDC	https://wwwn.cdc.gov/norsdashboard/
2006	8	USA	AMR A	Salmonella enterica	Typhimurium	Salmonella spp.	Cheese	1	20	0	Grocery store	NORS CDC	https://wwwn.cdc.gov/norsdashboard/
2007	6	USA	AMR A	Salmonella enterica	Typhimurium	Salmonella spp.	Cheese	1	13	0	Household	NORS CDC	https://wwwn.cdc.gov/norsdashboard/
2016	5	USA	AMR A	Salmonella unknown sp.		Salmonella spp.	Milk	1	12	0	Household	NORS CDC	https://wwwn.cdc.gov/norsdashboard/
2018	9	USA	AMR A	Salmonella unknown sp.		Salmonella spp.	Milk	1	33	0	Farm	NORS CDC	https://wwwn.cdc.gov/norsdashboard/
2000		Japan	WPR A	Salmonella unknown sp.		Salmonella spp.	Homemade ice cream	1	13	0	Unknown	Ministry of Health Japan	https://www.e-stat.go.jp/stat-search/files?page=1&toukei=00450191&tstat=000001040259
2003	1	New Zealand	WPR A	Salmonella unknown sp.		Salmonella spp.	Milk	1	2	0	Unknown	ESR	Available by request from ksc.surveillancequeries@esr.cri.nz
2009	8	New Zealand	WPR A	Salmonella unknown sp.		Salmonella spp.	Milk	1	4	0	Farm	ESR	Available by request from ksc.surveillancequeries@esr.cri.nz
2010	10	New Zealand	WPR A	Salmonella unknown sp.		Salmonella spp.	Milk	1	2	0	Farm	ESR	Available by request from ksc.surveillancequeries@esr.cri.nz
2010	11	New Zealand	WPR A	Salmonella unknown sp.		Salmonella spp.	Cream	1	4	0	Unknown	ESR	Available by request from ksc.surveillancequeries@esr.cri.nz
2014	4	New Zealand	WPR A	Salmonella unknown sp.		Salmonella spp.	Milk	1	3	0	Unknown	ESR	Available by request from ksc.surveillancequeries@esr.cri.nz
2011	1	USA	AMR A	Unknown		Unknown	Milk	1	5	0	Unknown	NORS CDC	https://wwwn.cdc.gov/norsdashboard/
2000		UK	EUR A	Unknown		Unknown	Milk	3	9	0	Unknown	PHE	https://www.cambridge.org/core/journals/epidemiology-and-infection/article/gastrointestinal-infections-caused-by-consumption-of-raw-drinking-milk-in-england-wales-19922017/3E0D1D13A7CDD3D54E5BEBB924B593E1
2002		UK	EUR A	Unknown		Unknown	Milk	2	9	0	Unknown	PHE	https://www.cambridge.org/core/journals/epidemiology-and-infection/article/gastrointestinal-infections-caused-by-consumption-of-raw-drinking-milk-in-england-wales-19922017/3E0D1D13A7CDD3D54E5BEBB924B593E1
2013	3	New Zealand	WPR A	Unknown		Unknown	Milk	1	4	0	Unknown	ESR	Available by request from ksc.surveillancequeries@esr.cri.nz
2013	12	New Zealand	WPR A	Unknown		Unknown	Milk	1	6	0	Unknown	ESR	Available by request from ksc.surveillancequeries@esr.cri.nz
2014		Finland	EUR A	Yersina pseudotuberculosis		Yersina pseudotuberculosis	Milk	1	55	0	Household	Eurosurveillance	https://www.eurosurveillance.org/content/10.2807/1560-7917.ES.2015.20.40.30033
2000		Australia	WPR A	Campylobacter unknown sp.		Campylobacter spp.	Milk	1	12	0	Farm	Food standards Australia New Zealand, Microbiological risk assessment of raw cow milk	https://www.foodstandards.gov.au/code/proposals/documents/p1007%20ppps%20for%20raw%20milk%201ar%20sd1%20cow%20milk%20risk%20assessment.pdf
2000		Australia	WPR A	Campylobacter unknown sp.		Campylobacter spp.	Milk	1	21	0	Camp	Food standards Australia New Zealand, Microbiological risk assessment of raw cow milk	https://www.foodstandards.gov.au/code/proposals/documents/p1007%20ppps%20for%20raw%20milk%201ar%20sd1%20cow%20milk%20risk%20assessment.pdf
2001		Australia	WPR A	Unknown		Unknown	Milk	1	12	0	Camp	Food standards Australia New Zealand, Microbiological risk assessment of raw cow milk	https://www.foodstandards.gov.au/code/proposals/documents/p1007%20ppps%20for%20raw%20milk%201ar%20sd1%20cow%20milk%20risk%20assessment.pdf
2001		Australia	WPR A	Cryptosporidium unknown sp.		Cryptosporidium spp.	Milk	1	8	0	Community	Food standards Australia New Zealand, Microbiological risk assessment of raw cow milk	https://www.foodstandards.gov.au/code/proposals/documents/p1007%20ppps%20for%20raw%20milk%201ar%20sd1%20cow%20milk%20risk%20assessment.pdf
2003		Australia	WPR A	Campylobacter unknown sp.		Campylobacter spp.	Milk	1	13	0	School	Food standards Australia New Zealand, Microbiological risk assessment of raw cow milk	https://www.foodstandards.gov.au/code/proposals/documents/p1007%20ppps%20for%20raw%20milk%201ar%20sd1%20cow%20milk%20risk%20assessment.pdf
2003		Australia	WPR A	Campylobacter unknown sp.		Campylobacter spp.	Milk	1	14	0	Camp	Food standards Australia New Zealand, Microbiological risk assessment of raw cow milk	https://www.foodstandards.gov.au/code/proposals/documents/p1007%20ppps%20for%20raw%20milk%201ar%20sd1%20cow%20milk%20risk%20assessment.pdf
